# Supplementary material for: H3K4 tri-methylation breadth at transcription start sites impacts the transcriptome of systemic lupus erythematosus
Source: PubMed Central journal article supplement (PMC4736279; doi:10.1186/s13148-016-0179-4), 2016-02-02

# A Bimodal distribution of TSS H3K4me3

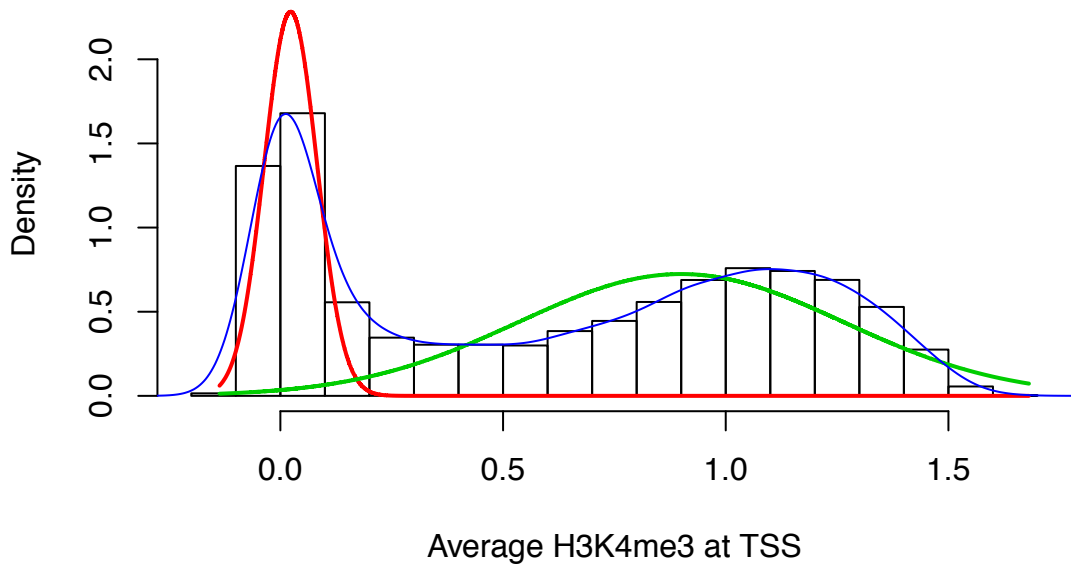

# B Difference of H3K4me3 levels between nearby regions

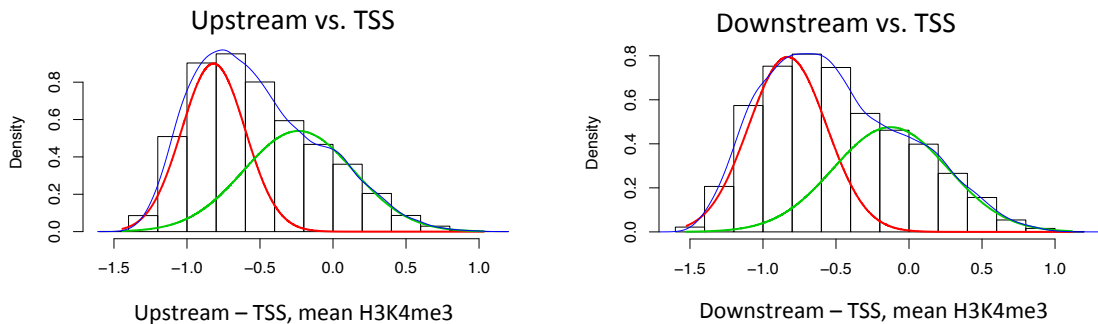

Supplement: 13148_2016_179_MOESM1_ESM.pdf [file 13148_2016_179_MOESM1_ESM.pdf]
