# Supplementary material for: H3K4 tri-methylation breadth at transcription start sites impacts the transcriptome of systemic lupus erythematosus
Source: PubMed Central journal article supplement (PMC4736279; doi:10.1186/s13148-016-0179-4), 2016-02-02

- H3K4me3 sequencing depth
- Expression-H3K4me3 overlapping
- TFBS frequency

# Plot H3K4me4 peaks

Plot sequencing depth of H3K4me3 at one or a set of TSSs. The depth was the normalized average of 6 control or 6 SLE samples. By default, the plotted data is in log2 scale, so a difference of 1.0 is the same as 2 fold change. Plot options:

- "Plot unit": plot individual TSS or all TSSs mapped to a gene set.
- "Plot value": plot control and SLE data separately, or their difference (SLE - control).
- "Plot type": plot type (landscape vs. barplot).
- "Plot scale": plot data in log2 scale (default), or unlogged scale.
- "Plot range": plot range around TSS (-10kb to +10kb).

## Select a TSS

Search:

| ID           | Gene   | Gene_ID | Chr  | Location | Strand | H3K4me3_Control | H3K4me3_SLE |
|--------------|--------|---------|------|----------|--------|-----------------|-------------|
| chr1_1243269 | ACAP3  | 116983  | chr1 | 1243269  | -      | Both            | Both        |
| chr1_1709909 | NADK   | 65220   | chr1 | 1709909  | -      | Both            | Both        |
| chr1_1710297 | NADK   | 65220   | chr1 | 1710297  | -      | Both            | Both        |
| chr1_1822526 | GNB1   | 2782    | chr1 | 1822526  | -      | Both            | Both        |
| chr1_6052357 | KCNAB2 | 8514    | chr1 | 6052357  | +      | Both            | Both        |

Showing 1 to 5 of 27,588 entries Previous Next

## Select a gene set

BioSystems  Clear selection

Search:

| ID               | Name                                                                      | Size |
|------------------|---------------------------------------------------------------------------|------|
| GO:0002200_human | somatic diversification of immune receptors                               | 47   |
| GO:0002204_human | somatic recombination of immunoglobulin genes involved in immune response | 18   |
| GO:0002208_human | somatic diversification of immunoglobulins involved in immune response    | 18   |
| GO:0002218_human | activation of innate immune response                                      | 156  |
| GO:0002220_human | innate immune response activating cell surface receptor signaling pathway | 7    |

Showing 1 to 5 of 150 entries (filtered from 19,440 total entries) Previous Next

**Select plot unit**

Individual TSS

Gene set average

**Select plot value**

Control/SLE separately

Control-SLE difference

**Select plot type**

Plot landscape

Plot bar

**Select plot scale**

Logged

Unlogged

**Select plot range**

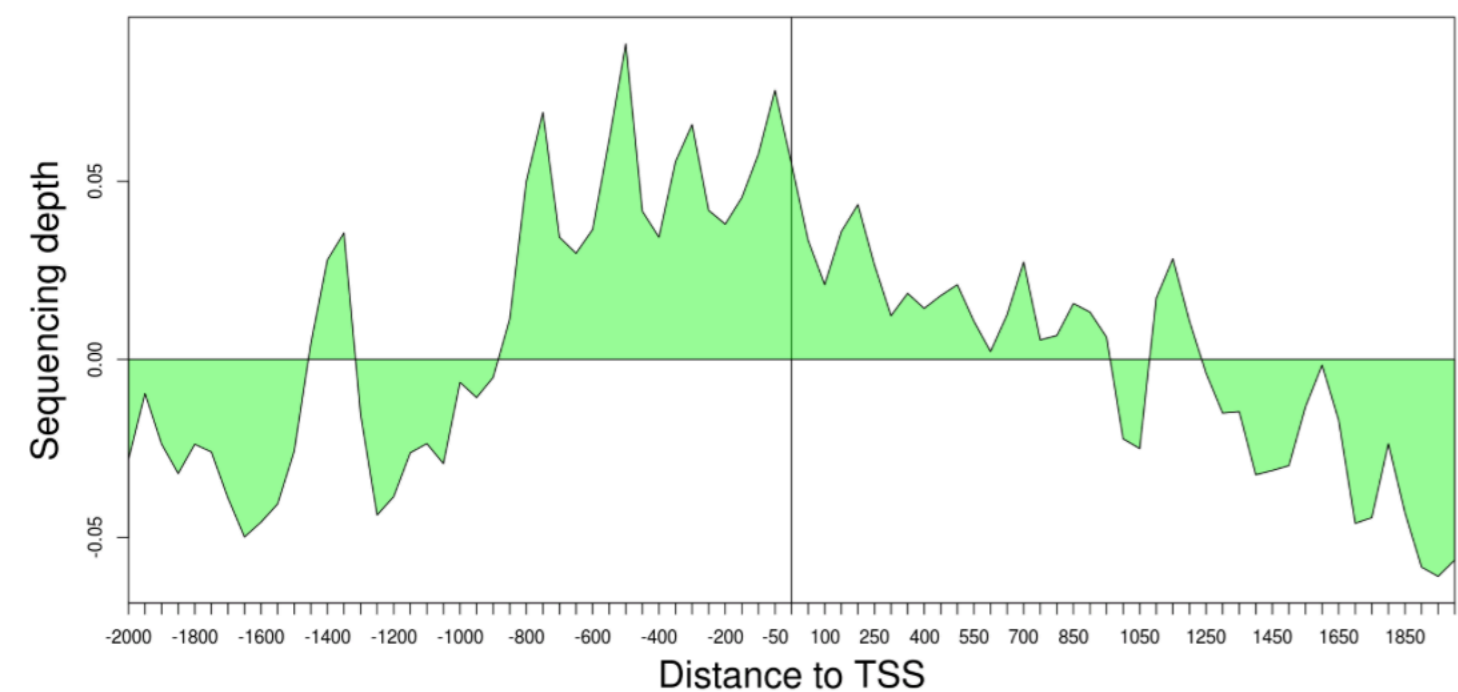

Supplement: 13148_2016_179_MOESM3_ESM.pdf [file 13148_2016_179_MOESM3_ESM.pdf]
