# Supplementary material for: H3K4 tri-methylation breadth at transcription start sites impacts the transcriptome of systemic lupus erythematosus
Source: PubMed Central journal article supplement (PMC4736279; doi:10.1186/s13148-016-0179-4), 2016-02-02

# Plot TFBS frequency

Plot frequency of matches to each PWM (point weighted matrix) at TSS. TSSs were grouped based on H3K4me3 peak breadth. Plot options:

- "Select H3K4me3 pattern": H3K4me3 peak patterns, means no detectable H3K4me3 higher than background.
- "Plot relative enrichment": Plot relative enrichment to if checked.

**Select H3K4me3 pattern**

Narrow  
 Upstream  
 Downstream  
 Both  
 Unclassified  
 No H3K4me3

Plot relative enrichment

**Select a PWM**

Search:

| ID     | Name | Length | Source | Consensus       | GC        | N      | Narrow | Upstream | Downstream | Both   | Unclassified | No.H3K4me3 |
|--------|------|--------|--------|-----------------|-----------|--------|--------|----------|------------|--------|--------------|------------|
| EN0200 | IRF1 | 15     | ENCODE | YRRCCAATCRRARS  | 0.4945534 | 27509  | 0.9560 | 1.2484   | 1.0445     | 1.7856 | 1.1590       | 1          |
| EN0201 | IRF1 | 10     | ENCODE | RAAASYGAAA      | 0.2831776 | 83421  | 1.1348 | 0.7805   | 0.7400     | 0.4702 | 0.8338       | 1          |
| EN0202 | IRF1 | 15     | ENCODE | TGASTCATWWYGRRA | 0.3927778 | 31152  | 1.1352 | 0.6353   | 0.6157     | 0.3363 | 0.6929       | 1          |
| EN0203 | IRF1 | 10     | ENCODE | RRGGAASTGR      | 0.5330189 | 117666 | 0.9426 | 1.0530   | 1.0709     | 0.9764 | 1.0420       | 1          |
| EN0204 | IRF1 | 9      | ENCODE | AGTCATYTC       | 0.3956638 | 36835  | 1.0411 | 0.6903   | 0.6884     | 0.4338 | 0.7795       | 1          |

Showing 1 to 5 of 17 entries (filtered from 2,414 total entries)

Previous Next

EN0200 IRF1 YRRCCAATCRRARS

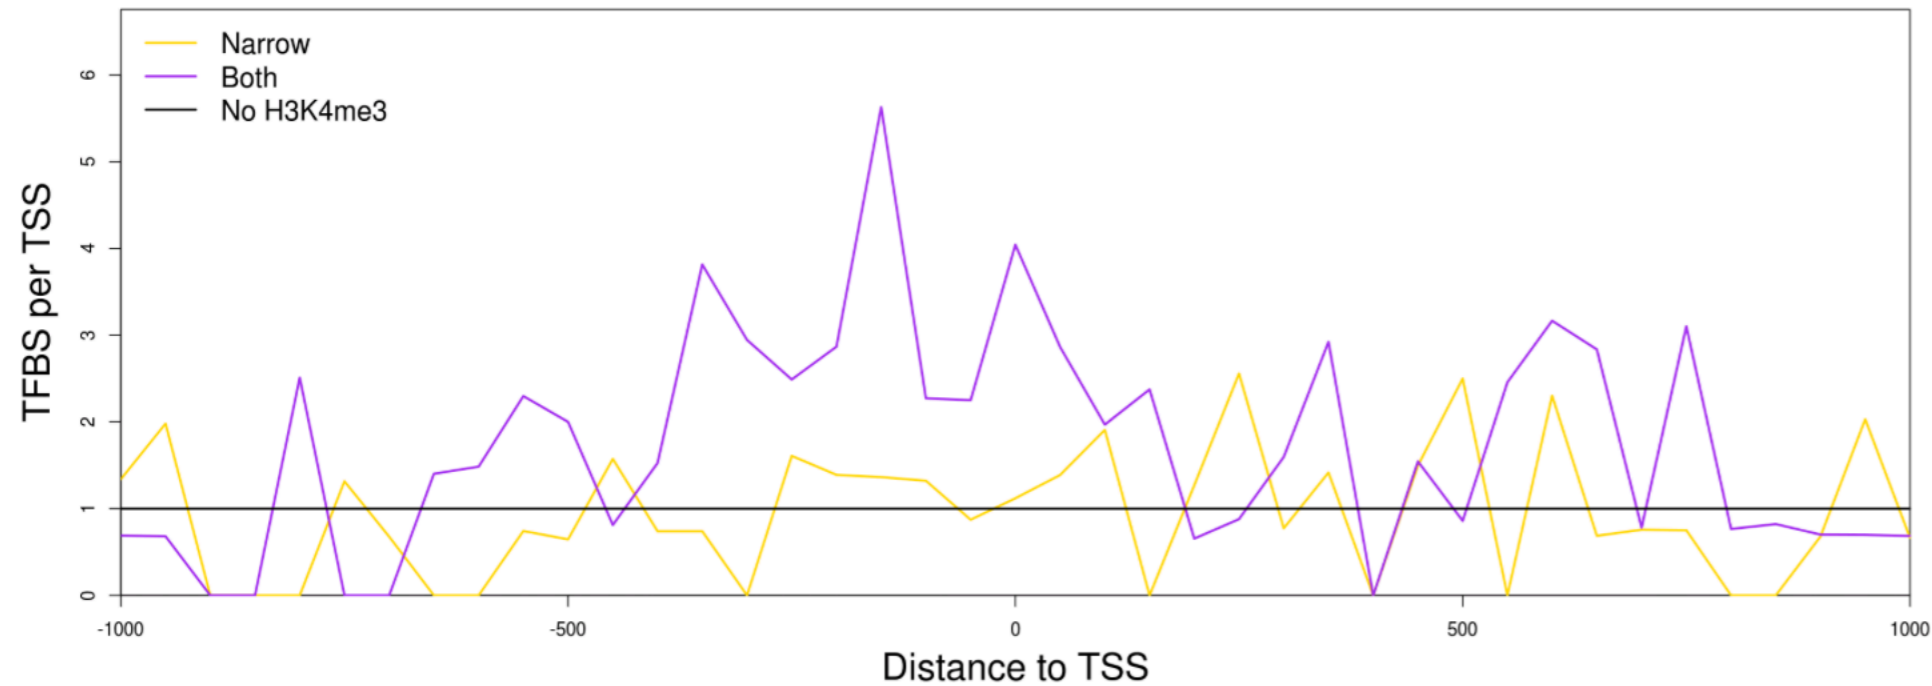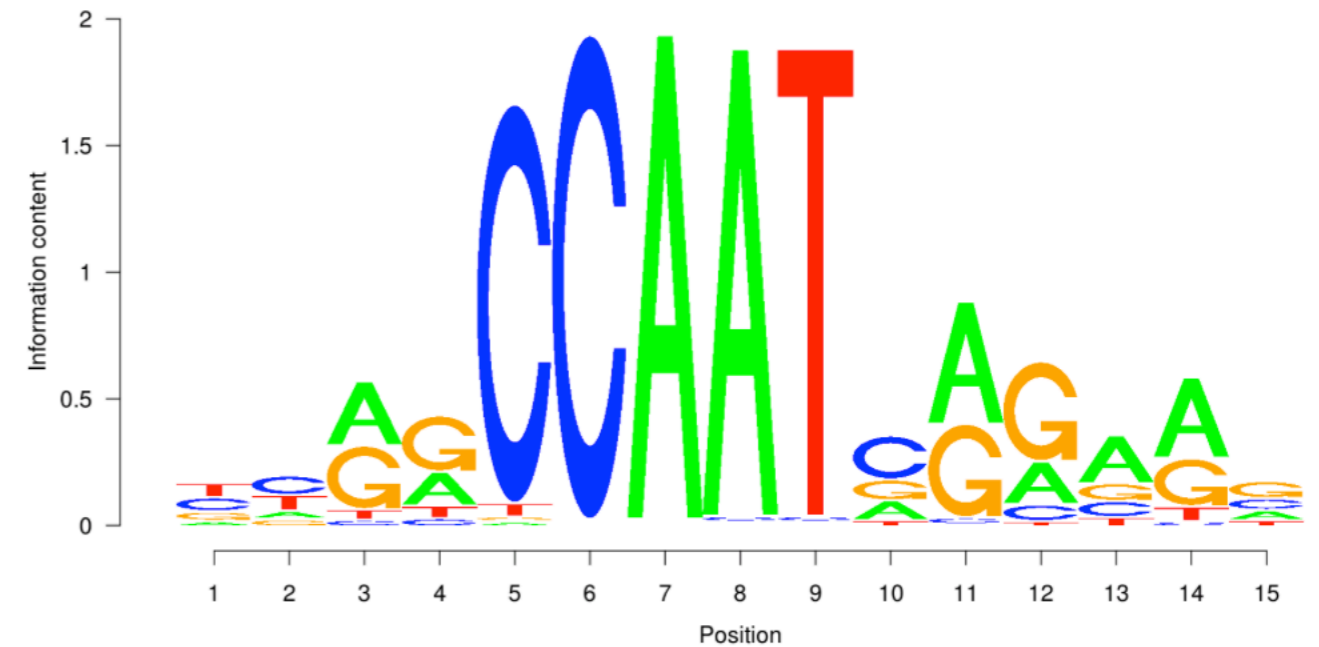

Supplement: 13148_2016_179_MOESM4_ESM.pdf [file 13148_2016_179_MOESM4_ESM.pdf]
